# Supplementary material for: Transconjunctival versus Transcutaneous Injection of Botulinum Toxin into the Lacrimal Gland to Reduce Lacrimal Production: A Randomized Controlled Trial
Source: MDPI journal article supplement (doi:10.3390/toxins13020077), 2021-01-21
Supplement: s1 [file s1]

# Supplementary Materials: Transconjunctival versus Transcutaneous Injection of Botulinum Toxin into the Lacrimal Gland to Reduce Lacrimal Production: a Randomized Controlled Trial

Andrew G. Lee, Shin-Hyo Lee, Minsu Jang, Sang Jae Lee and Hyun Jin Shin

**Table S1.** Findings of objective and subjective evaluations after the botulinum toxin BTX-A injections into the lacrimal. GBI, Glasgow Benefit Inventory. Data are *n* (%) or mean  $\pm$  standard-deviation values.

| Variable                    | CON Group     | CUT Group     | <i>p</i>           |
|-----------------------------|---------------|---------------|--------------------|
| TMH, mm                     |               |               |                    |
| 2 weeks after intervention  | 0.22 ± 0.07   | 0.27 ± 0.07   | 0.218 <sup>a</sup> |
| 6 weeks after intervention  | 0.20 ± 0.08   | 0.24 ± 0.10   |                    |
| 12 weeks after intervention | 0.22 ± 0.07   | 0.25 ± 0.09   |                    |
| 24 weeks after intervention | 0.22 ± 0.07   | 0.23 ± 0.08   |                    |
| STA value, mm               |               |               |                    |
| 2 weeks after intervention  | 11.11 ± 6.62  | 10.44 ± 7.11  | 0.459 <sup>a</sup> |
| 6 weeks after intervention  | 9.20 ± 5.98   | 11.07 ± 7.59  |                    |
| 12 weeks after intervention | 11.29 ± 5.36  | 11.24 ± 6.50  |                    |
| 24 weeks after intervention | 11.44 ± 6.15  | 9.32 ± 5.14   |                    |
| Outdoor Munk score          |               |               |                    |
| 2 weeks after intervention  | 1.79 ± 1.17   | 1.44 ± 0.70   | 0.218 <sup>a</sup> |
| 6 weeks after intervention  | 1.46 ± 0.92   | 1.33 ± 0.62   |                    |
| 12 weeks after intervention | 1.14 ± 1.07   | 1.08 ± 0.95   |                    |
| 24 weeks after intervention | 1.25 ± 0.97   | 1.48 ± 1.19   |                    |
| Indoor Munk score           |               |               |                    |
| 2 weeks after intervention  | 1.14 ± 1.15   | 0.85 ± 0.82   | 0.082 <sup>a</sup> |
| 6 weeks after intervention  | 0.89 ± 0.92   | 0.59 ± 0.57   |                    |
| 12 weeks after intervention | 0.79 ± 0.83   | 0.44 ± 0.51   |                    |
| 24 weeks after intervention | 0.71 ± 0.66   | 0.72 ± 0.89   |                    |
| GBI score                   |               |               |                    |
| 6 weeks after intervention  | 14.23 ± 21.32 | 13.70 ± 20.37 |                    |
| 12 weeks after intervention | 18.58 ± 16.69 | 12.59 ± 12.64 |                    |

|                                    |               |               |                    |
|------------------------------------|---------------|---------------|--------------------|
| 24 weeks after intervention        | 15.63 ± 14.80 | 12.96 ± 12.80 | 0.415 <sup>a</sup> |
| Duration of symptom relief, months | 5.25 ± 2.42   | 6.07 ± 1.48   | 0.176 <sup>b</sup> |
| Adverse effect                     | 3/28 (10.7%)  | 3/25 (12%)    | 1.000 <sup>c</sup> |
| Recommendation to others           | 21/28 (75%)   | 18/25 (72%)   | 1.000 <sup>c</sup> |
| Overall success                    | 25/28 (89.3%) | 21/25 (84%)   | 0.694 <sup>c</sup> |

CON, transconjunctival injection; CUT, transcutaneous injection; <sup>a</sup> Repeated-measures analysis of variance; <sup>b</sup> Mann-Whitney *U* test; <sup>c</sup> Fisher's exact test.

**Table S2.** Change in Glasgow Benefit Inventory (GBI) of enrolled patients on a 5 point Likert scale: 1 = Much worse, 2 = A little or somewhat worse, 3 = No change, 4 = A little or somewhat better, 5 = Much better.

|     | Question                                                                                       | Score<br>6 Weeks | Score<br>12 Weeks | Score<br>24 Weeks | Average<br>Score |
|-----|------------------------------------------------------------------------------------------------|------------------|-------------------|-------------------|------------------|
| 1.  | Has the result of the operation affected the things you do?                                    | 3.6 ± 0.7        | 3.5 ± 0.7         | 3.7 ± 0.6         | 3.57             |
| 2.  | Have the results of the operation made your overall life better or worse?                      | 3.6 ± 0.9        | 3.8 ± 0.7         | 3.6 ± 0.7         | 3.65             |
| 3.  | Since the operation, have you felt more or less optimistic about the future?                   | 3.6 ± 0.8        | 3.8 ± 0.6         | 3.6 ± 0.6         | 3.65             |
| 4.  | Since your operation, do you feel more or less embarrassed when with a group of people?        | 3.2 ± 0.7        | 3.3 ± 0.7         | 3.1 ± 0.7         | 3.22             |
| 5.  | Since your operation, do you have more or less self-confidence?                                | 3.5 ± 0.8        | 3.4 ± 0.7         | 3.6 ± 0.6         | 3.50             |
| 6.  | Since your operation, have you found it easier or harder to deal with company?                 | 3.4 ± 0.8        | 3.4 ± 0.6         | 3.4 ± 0.6         | 3.41             |
| 7.  | Since your operation, do you feel that you have more or less support from your friends?        | 3.1 ± 0.6        | 3.3 ± 0.5         | 3.3 ± 0.5         | 3.23             |
| 8.  | Have you been to your family doctor, for any reason, more or less often, since your operation? | 2.7 ± 0.5        | 2.9 ± 0.5         | 2.7 ± 0.7         | 2.80             |
| 9.  | Since your operation, do you feel more or less confident about job opportunities?              | 3.1 ± 0.3        | 3.1 ± 0.4         | 3.2 ± 0.5         | 3.15             |
| 10. | Since your operation, do you feel more or less self-conscious?                                 | 2.8 ± 1.0        | 2.7 ± 0.9         | 2.7 ± 0.7         | 2.73             |
| 11. | Since your operation, are the more or fewer people who really care about you?                  | 3.2 ± 0.7        | 3.2 ± 0.7         | 3.3 ± 0.6         | 3.23             |
| 12. | Since you had the operation, do you catch colds or infections more or less often?              | 3.5 ± 0.9        | 3.6 ± 1.1         | 3.6 ± 0.9         | 3.55             |
| 13. | Have you had to take more or less medicine for any reason, since your operation?               | 2.9 ± 0.2        | 3.0 ± 0.2         | 2.9 ± 0.6         | 2.94             |
| 14. | Since your operation, do you feel better or worse about yourself?                              | 3.7 ± 0.9        | 3.7 ± 0.8         | 3.6 ± 0.7         | 3.63             |
| 15. | Since your operation, do you feel that you have had more or less support from your family?     | 3.4 ± 0.9        | 3.4 ± 0.6         | 3.4 ± 0.8         | 3.39             |
| 16. | Since your operation, are you more or less inconvenienced by your health problem?              | 3.5 ± 1.1        | 3.5 ± 1.0         | 3.5 ± 0.8         | 3.52             |
| 17. | Since your operation, have you been able to participate in more or fewer social activities?    | 3.1 ± 0.3        | 3.1 ± 0.4         | 3.1 ± 0.3         | 3.07             |
| 18. | Since your operation, have you been more or less inclined to withdraw from social situations?  | 3.1 ± 0.4        | 3.0 ± 0.3         | 3.0 ± 0.3         | 3.02             |
|     | Rasch scale (score, −100–100)*                                                                 | 14.0 ± 20.4      | 15.7 ± 14.8       | 14.3 ± 13.6       | 14.65            |

\*A final score is calculated using a Rasch scale, which ranges from −100 (maximum detriment) to 100 (maximum benefit).

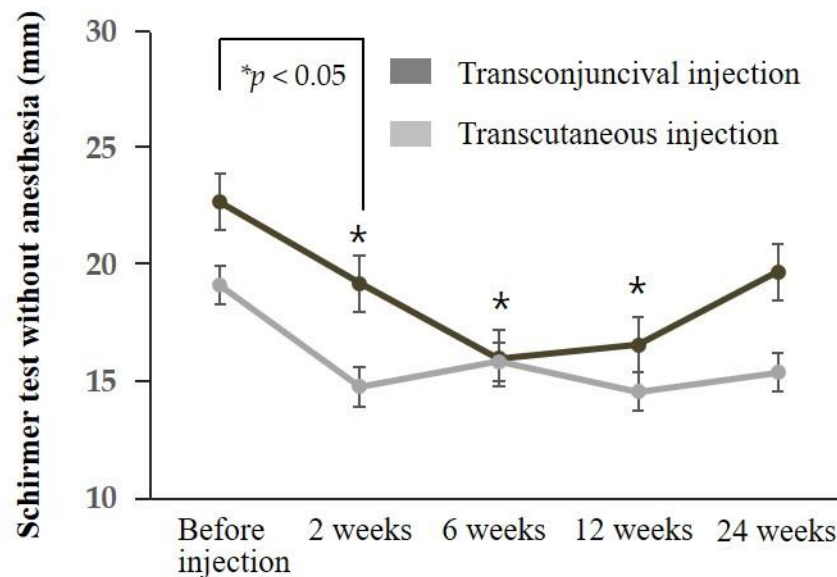

**Figure S1.** Change in value of Schirmer's I test without topical anesthesia during the 24 weeks of follow-up in the CON and CUT groups. The STA value decreased significantly relative to before injections ( $p < 0.05$ ) at 2, 6, and 12 weeks. \*RMANOVA.
